**Title:** Testing for local adaptation and evolutionary potential along altitudinal gradients in rainforest *Drosophila*: limitations of laboratory estimates.

**Running head:** Adaptive variation along ecological gradients

**Authors:** Eleanor K. O'Brien<sup>1,2</sup>, Megan Higgie<sup>3</sup>, Alan Reynolds<sup>1,4</sup>, Ary A. Hoffmann<sup>5</sup> & Jon R. Bridle<sup>1</sup>

**Author affiliations:**

1. School of Biological Sciences, Life Sciences Building, University of Bristol, Bristol BS8 1TQ, United Kingdom
2. Current address: Milner Centre for Evolution, Department of Biology & Biochemistry, University of Bath, Claverton Down, Bath BA2 7AY, United Kingdom
3. College of Marine & Environmental Sciences, James Cook University, Queensland 4811, Australia
4. Current address: Institute of Biodiversity, Animal Health & Comparative Medicine, College of Medical, Veterinary & Life Sciences, University of Glasgow, Glasgow G12 8QQ, United Kingdom
5. Bio21 Institute, University of Melbourne, Victoria 3052, Australia

**Author email addresses:**

EKO: e.k.o'brien@bath.ac.uk  
 MH: megan.higgie@jcu.edu.au  
 AR: A.Reynolds.2@research.gla.ac.uk  
 AAH: ary@unimelb.edu.au  
 JRB: jon.bridle@bristol.ac.uk

**Corresponding author:**

Eleanor K. O'Brien, Milner Centre for Evolution, Department of Biology & Biochemistry, University of Bath, Claverton Down, Bath BA2 7AY, United Kingdom; Ph: +44 782 739 5011, Email: e.k.o'brien@bath.ac.uk

**Keywords:** altitudinal gradients; caged transplant experiments; *Drosophila*; fitness; genetic variance; local adaptation; species distributions

**Type of paper:** Primary Research Article

**Word Count** (abstract): 299

**Word Count** (main text including Introduction, Materials and Methods, Results, Discussion, Acknowledgements, and Table and Figure captions): 8034

**Number of figures:** 4

**Number of tables:** 2

# 1 ABSTRACT

2 Predicting how species will respond to the rapid climatic changes predicted this century is an  
3 urgent task. Species Distribution Models (SDMs) use the current relationship between  
4 environmental variation and species' abundances to predict the effect of future environmental  
5 change on their distributions. However, two common assumptions of SDMs are likely to be  
6 violated in many cases: (1) That the relationship of environment with abundance or fitness is  
7 constant throughout a species' range and will remain so in future, and (2) That abiotic factors  
8 (e.g. temperature, humidity) determine species' distributions. We test these assumptions by  
9 relating field abundance of the rainforest fruit fly *Drosophila birchii* to ecological change  
10 across gradients that include its low and high altitudinal limits. We then test how such  
11 ecological variation affects the fitness of 35 *D. birchii* families transplanted in 591 cages to  
12 sites along two altitudinal gradients, to determine whether genetic variation in fitness responses  
13 could facilitate future adaptation to environmental change. Overall, field abundance was  
14 highest at cooler, high altitude sites, and declined towards warmer, low altitude sites. By  
15 contrast, cage fitness (productivity) *increased* towards warmer, lower altitude sites, suggesting  
16 that biotic interactions (absent from cages) drive ecological limits at warmer margins. In  
17 addition, the relationship between environmental variation and abundance varied significantly  
18 among gradients, indicating divergence in ecological niche across the species' range.  
19 However, there was no evidence for local adaptation within gradients, despite greater  
20 productivity of high altitude than low altitude populations when families were reared under  
21 laboratory conditions. Families also responded similarly to transplantation along gradients,  
22 providing no evidence for abiotic fitness trade-offs that would favour local adaptation. These  
23 findings highlight the importance of (1) measuring genetic variation of key traits under  
24 ecologically relevant conditions, and (2) considering the effect of biotic interactions when  
25 predicting species' responses to environmental change.

# 1 INTRODUCTION

2

3 Understanding the factors that determine species' distributions and local abundances is a  
 4 central goal of ecology, and is essential for predicting how populations, species and ecological  
 5 communities will respond to environmental change (Ehrlén & Morris, 2015). Species'  
 6 distribution models (also known as ecological niche or bioclimatic envelope models) are used  
 7 to relate species' abundances to environmental variables, and to predict shifts in their  
 8 distributions based on future climatic conditions (Elith & Leathwick, 2009, Guisan &  
 9 Thuiller, 2005, Pearson & Dawson, 2003, Thomas *et al.*, 2004). Such models typically assume  
 10 that the association between the environment and a species' abundance (i.e. its niche) does not  
 11 vary across the species' geographical range, and will remain stable in the future (but see  
 12 Kearney *et al.*, 2009). However, spatial variation in environmental tolerances is observed  
 13 across many species' ranges, demonstrating local niche differentiation (Banta *et al.*, 2012,  
 14 Kelly *et al.*, 2012). In addition, genetic variation within populations may generate rapid  
 15 evolutionary responses to environmental change *in situ*, allowing population persistence  
 16 beyond current ecological limits (Bridle & Vines, 2007, Hoffmann *et al.*, 2015, Hoffmann &  
 17 Sgrò, 2011).

18

19 Ignoring variation in a species' ecological niche within populations, or between populations  
 20 across its geographical range, will have two contrasting consequences: (1) we may  
 21 overestimate the geographical distribution of a species if tolerances are assumed to be constant  
 22 throughout the species' range (i.e. that all populations can tolerate all currently occupied  
 23 conditions: Hampe, 2004, Kelly *et al.*, 2012); and (2) we may underestimate the potential for  
 24 species to persist through evolutionary change, where extinction would be predicted based on  
 25 current distributions (Davis *et al.*, 2005, Hoffmann & Sgrò, 2011, Kearney *et al.*, 2009).

1 Understanding the potential for rapid adaptation generated by standing genetic variation in  
2 fitness, both among and within populations, is therefore crucial when predicting the impacts of  
3 environmental change on population persistence, and the future geographical distributions of  
4 species (Atkins & Travis, 2010, Chevin *et al.*, 2010, Hampe, 2004, Holt, 2009, Lavergne *et al.*,  
5 2010).

6

7 Studies testing for local adaptation and genetic variation in environmental tolerances in the  
8 context of predicting responses to environmental change are rare for animals, where attention  
9 has focused on the evolution of traits in single populations (e.g. Charmantier & Gienapp,  
10 2014, Kruuk *et al.*, 2008). These data are more widely available in plants, and have been used  
11 to project future responses to environmental change. For example, Banta *et al.* (2012)  
12 modelled the niche breadth of *Arabidopsis thaliana* genotypes that varied in flowering time,  
13 and found a more than four-fold difference between genotypes in the size of their potential  
14 distributions. Similarly, studies of local adaptation in forest trees reveal genetic divergence in  
15 phenology and other ecological traits that are associated with their broad geographical  
16 distributions (e.g. Alberto *et al.*, 2013, Kremer *et al.*, 2012). In the few cases where genetic  
17 variation in ecological traits has been estimated across multiple populations in animals, this has  
18 typically been done under controlled conditions in the laboratory, rather than under field  
19 conditions, which will vary far more in time and space, meaning that selection may act on  
20 many more traits simultaneously, or at different points in time. Because environmental  
21 conditions affect the heritability of many traits (Charmantier & Garant, 2005, Hoffmann &  
22 Merilä, 1999, Kruuk *et al.*, 2008), laboratory assays of genetic variance in traits or fitness may  
23 not predict evolutionary trajectories in natural populations (Pemberton, 2010). These issues  
24 mean there is an urgent need for data on genetic variation in fitness across a range of naturally

1   varying environments, to determine how the relationship between the environment and fitness  
2   varies due to local adaptation, or in relation to genetic variation within populations.

3  
4   *Drosophila birchii* is endemic to the tropical rainforests of north-eastern Australia and Papua  
5   New Guinea (Schiffer & McEvey, 2006). Laboratory assays of environmental tolerance traits  
6   in this species have revealed genetic divergence along both latitudinal (Griffiths *et al.*, 2005,  
7   Hoffmann *et al.*, 2003, van Heerwaarden *et al.*, 2009) and some altitudinal (Bridle *et al.*, 2009)  
8   gradients, consistent with local adaptation to temperature and humidity variation. In addition,  
9   laboratory assays have revealed lower levels of genetic variation in ecologically important  
10   traits associated with tolerance of climatic stresses within populations close to the species'  
11   range margin, which may constrain adaptation (e.g. Hoffmann *et al.*, 2003, Kellermann *et al.*,  
12   2006). These results suggest that ecological tolerances vary substantially throughout the range  
13   of *D. birchii*, and that the potential for adaptation to environmental change also varies among  
14   populations. However, genetic variation in fitness under field conditions has not previously  
15   been measured, therefore it is not known how predictions of evolutionary potential based on  
16   genetic variation in traits measured in the laboratory relate to fitness variation in the more  
17   variable field environment, where biotic interactions are common and complex, and are  
18   themselves mediated by variation in abiotic factors.

19  
20   In this study, we examine the relationship between local abundance of *D. birchii* and  
21   environmental variation along four altitudinal gradients. These altitudinal gradients represent  
22   local ecological limits of this species, and show temperature and humidity variation across  
23   distances of 4-16 km of a similar magnitude to that observed across hundreds of kilometres of  
24   latitudinal range (see Table S1). In addition, we transplanted families of laboratory-reared *D.*  
25   *birchii* in cages along two altitudinal gradients and tracked their fitness under naturally-varying

1 environmental regimes, in order to: (i) determine the effect of environmental change (simulated  
2 by movement along an environmental gradient) on fitness of *D. birchii*, (ii) test for local  
3 adaptation across these gradients, and (iii) estimate genetic variation in fitness, both overall,  
4 and in response to movement along the gradient (i.e., genetic variation in the ‘reaction norms’  
5 of fitness). By transplanting virgin flies, we ensured that courtship, mating, reproduction, and  
6 the development and survival of offspring occurred entirely under field conditions, and  
7 therefore captured all of these important components of fitness variation. Flies in cages  
8 experienced abiotic conditions similar to those outside cages, but were not exposed to biotic  
9 interactions. Therefore, by comparing the change in fitness of *D. birchii* in cages as a result of  
10 movement along environmental gradients with the change in its field abundance, we were also  
11 able to test the degree to which abiotic environmental conditions alone determine species’  
12 distributions. Furthermore, by transplanting flies from multiple populations and families, we  
13 were able to evaluate the role of among-population divergence in mediating this relationship,  
14 and the potential for rapid changes in ecological tolerances in the future through adaptation.  
15 Finally, by comparing laboratory estimates of genetic variation in fitness with those made in  
16 the field, we provide one of the first tests of how trait genetic variation estimated in the  
17 laboratory predicts the potential for evolutionary responses to environmental change under  
18 more ecologically realistic conditions.

19

20

## 21 **MATERIALS AND METHODS**

22

### 23 *Predicting the local abundance of D. birchii from environmental variables*

24

### 25 *Estimating D. birchii abundance along altitudinal gradients*

1 Adult *D. birchii* were collected between February-May in 2010-2012 from a total of 94 sites,  
 2 comprising 10-30 sites along each of four altitudinal gradients (Paluma, Kirrama, Mt Edith and  
 3 Mt Lewis) in northern Queensland, Australia. Gradients were between 16°30'S and 19°00'S  
 4 latitude (a distance of ~300 km), and spanned altitudes from 23 - 1233m above sea level (a.s.l.),  
 5 over distances of 3.7 - 16.3 km (Figure 1; Table S1). At each site, 5 - 20 buckets of mashed  
 6 banana (> 1 day old) were placed at least 5m apart for 5 - 10 days. Flies were sampled from  
 7 each bucket twice daily using a sweep net; captured flies were then sorted under CO<sub>2</sub>  
 8 anaesthesia to identify *D. birchii*, and to isolate *D. birchii* females for isofemale line generation  
 9 (see below).

10

11 Estimates of local abundance were the mean number of *D. birchii* males captured per site per  
 12 day, as used by Bridle *et al.* (2009). We used the number of males captured (rather than total  
 13 number of flies) because female *D. birchii* cannot be distinguished from closely-related species  
 14 in the *serrata* species complex, *D. serrata* and *D. bunnanda*, whereas males can be identified  
 15 by examining their genital bristles (Schiffer & McEvey, 2006). We estimated abundance at 48  
 16 sites along two gradients sampled in 2010 (Kirrama and Mt Lewis) and 46 sites along three  
 17 gradients in 2011 (Paluma, Mt Edith and Mt Lewis) (Figure 1; Table S1). There was no  
 18 significant variation in the magnitude or distribution of abundance between the two years of  
 19 sampling at Mt Lewis (the only gradient sampled in both years; see Table S1), therefore  
 20 abundance data at sites along this gradient were combined across years.

21

## 22 *Measuring environmental predictors of D. birchii abundance*

23 Tinytag dataloggers were attached to trees at 10 - 30 sites along each altitudinal gradient to take  
 24 hourly measurements of temperature (°C) and relative humidity (%) between February 2010

1 and June 2012. This included the sampling period, as well as the duration of the cage  
2 transplant experiments. In addition, the abundance of the other *serrata* complex species, *D.*  
3 *bunnanda* and *D. serrata*, was estimated at each site based on numbers of males captured in  
4 traps. This variable was included to provide a measure of the frequency of interspecific  
5 interactions at different points along gradients. These species are closely related to *D. birchii*,  
6 use similar resources, and have partially overlapping geographical distributions, although their  
7 local abundances show different patterns with respect to environmental conditions (Schiffer &  
8 McEvey, 2006). *Drosophila serrata* has a much broader latitudinal range than *D. birchii*, and  
9 is considered a habitat generalist. *Drosophila bunnanda*, like *D. birchii*, is a rainforest  
10 specialist and has a more restricted distribution, with a southern border more than 500 km north  
11 of that of *D. birchii*. Neither of these species was present at Mt Edith, but they were found at  
12 some sites at Paluma, Kirrama and Mt Lewis. At the sites sampled, *D. bunnanda* was much  
13 more common than *D. serrata* (determined by genotyping field-caught males at the diagnostic  
14 locus *Eip 75B*), and numbers of *D. serrata* captured were too low to be used as an independent  
15 predictor of *D. birchii* abundance. We therefore combined estimates of the abundances of *D.*  
16 *bunnanda* and *D. serrata* as a single measure.

17

18 Temperature and humidity data from Tinytag dataloggers and estimates of the abundance of  
19 other species of the *serrata* species complex were used to produce six environmental predictors  
20 of *D. birchii* abundance: (a) Abundance of non-*D. birchii serrata*-complex species  
21 (NONBIRCH), (b) Mean daily minimum temperature (MDT<sub>min</sub>), (c) Mean daily temperature  
22 (MDT), (d) Mean daily maximum temperature (MDT<sub>max</sub>), (e) Mean daily temperature range  
23 (MDT<sub>diff</sub>), and (f) Mean daily humidity (MDH).

24



1 Linear regression revealed that most of the six environmental variables were strongly correlated  
 2 with both latitude and altitude (Table S2). The environmental variables were also all highly  
 3 correlated with one another (Table S3). To avoid collinearity of factors in models predicting  
 4 abundance, we identified a set of uncorrelated variables by conducting a Principal Components  
 5 Analysis (PCA) using the *prcomp* function in *R* v3.1.2 (R Core Team, 2014), with all variables  
 6 standardised to a mean of 0 and standard deviation of 1. Temperature and humidity data  
 7 collected over the full two-year measurement period were used in the PCA. These values were  
 8 highly correlated with those seen over the sampling periods, and over the course of the caged  
 9 transplant experiments. The first two Principal Components (PCs) together accounted for 89%  
 10 of the total variation in the environmental variables (Table S4), and were included as factors in  
 11 linear models predicting *D. birchii* abundance. The first Principal Component (PC1) captured  
 12 the majority (76.8%) of variation in the environmental variables, with relatively even loadings  
 13 of all six variables, whereas PC2 was dominated by the abundance of other *serrata*-complex  
 14 species (Table S4). The positions of sites at each gradient with respect to PC1 and PC2 are  
 15 shown in Figure 1.

16  
 17 A linear model was fitted using the full set of abundance data across all gradients, with mean  
 18 *D. birchii* abundance at each site as the response variable, and the following terms included as  
 19 predictors: gradient (categorical variable with four levels corresponding to the four altitudinal  
 20 gradients), linear and polynomial (quadratic) terms for PC1 and PC2 (continuous variables),  
 21 and interactions of gradient with each of the linear and quadratic PC terms. Abundance data  
 22 were weighted by the number of sampling days at each site in the linear model. We fitted an  
 23 additional set of models for each gradient separately, to explore environmental predictors found  
 24 to differ among gradients in their relationship with *D. birchii* abundance in the full model.  
 25 Linear models were fitted using the *lm* function in *R* v3.1.2 (R Core Team, 2014).

1

2

### 3 ***Testing for genetic variation in responses to environmental change: cage transplant***

#### 4 ***experiment***

5

6 In March-May 2012, 35 isofemale lines from two sites at the top and bottom of both the Mt  
7 Edith and Paluma gradients were collected, and reared through two generations to large  
8 numbers under laboratory conditions. They were then subjected to a line-cross design within  
9 collecting sites (see below and Figure S1), and virgin males and females from the lines  
10 generated were transplanted into 591 cages at multiple sites along the altitudinal gradient from  
11 which they were originally sampled (Figure S2). Total productivity was assessed for each  
12 cage, allowing tests for local adaptation and estimates of genetic variation in fitness at each  
13 gradient under naturally-varying environmental conditions. Because virgin flies were placed in  
14 cages *in situ* at field sites, all courtship, mating, egg-laying and larval and pupal development  
15 occurred under naturally varying conditions. Despite being similar lengths, the steepness and  
16 altitudinal ranges of the gradients differ. Paluma is much steeper than Mt Edith, covering twice  
17 the altitudinal range, and a much broader range of temperatures, humidity, and abundance of  
18 *serrata*-complex species (Table S1), as captured by the first two PCs (Figure 1). The design of  
19 the experiment is illustrated in Figure S2; details of the experimental procedures are given  
20 below.

21

#### 22 ***Establishment of isofemale lines***

23 Individual field-mated *D. birchii* females collected from two high and two low altitude sites at  
24 Paluma and Mt Edith were placed in 40 ml glass vials with 10 ml standard *Drosophila* media  
25 (agar, raw sugar, inactive yeast, propionic acid and methyl-4-hydroxybenzoate), supplemented

1 with live yeast, and left to oviposit for four days to initiate isofemale lines. These mothers were  
2 transferred to a fresh food vial every four days until they no longer produced offspring.  
3 Offspring of the same mother were then mixed across vials to found the next generation. Five  
4 isofemale lines were established for each site (four sites per gradient; 20 lines in total per  
5 gradient), and each isofemale line was maintained across 2–4 vials in a constant temperature  
6 (CT) room at 25 °C on a 12:12 hour light:dark cycle.

# 7

## 8 *Breeding flies for cage transplant experiment*

9 Isofemale lines collected from field sites were maintained in the laboratory for two generations  
10 after collection from the field in order to standardise maternal environment effects. Following  
11 this, we established crosses between lines from the same site to ensure rapid generation of large  
12 numbers for field transplants (Figure S1). We paired virgin females from each line with virgin  
13 males from each of the other lines from the same site (i.e. excluding within-line crosses), with  
14 three replicates per line-cross combination. The crossing scheme used to generate flies for cage  
15 transplants is summarised in Figure S1.

16

17 Each pair was left to mate and lay for five days and then discarded. Offspring emerging from  
18 these crosses were counted and sexed on eclosion ( $\pm$  12 hrs) each day until emergence was  
19 complete, and flies held separately by sex (up to 10 flies per vial) for up to 10 days before  
20 being transplanted to field cages. We then pooled offspring from the same maternal isofemale  
21 line, keeping the sexes separate to ensure all flies were unmated prior to establishing cages.  
22 Flies transplanted into cages therefore ranged in age from 3 – 10 days, but mixing together flies  
23 from the same maternal isofemale line meant that their distribution across cages and sites was

1 random with respect to age. We used this approach to avoid excluding lines with low fecundity  
 2 from being tested in the field. Transplanting ‘maternal isofemale lines’ (hereafter referred to as  
 3 ‘lines’) rather than generating mass bred lines for each site allowed us to maintain  
 4 representation in our experiment of as many maternal lines as possible, as well as (crucially)  
 5 enabling partitioning of among-line (genetic) variation in fitness under field conditions.

6

# 7 *Establishment of field transplant cages*

8 The cages used for field assays of line fitness were 600 ml clear plastic bottles with two 135  
 9 mm x 95 mm windows cut out, covered with 2 mm fly wire mesh and 30-denier nylon stocking  
 10 material, which allowed movement of air through the cages. Each cage was encased in 20 mm  
 11 wire mesh to prevent attack by birds and mammals. This cage construction allowed the  
 12 survival and productivity of flies to be monitored, while exposing them to temperature and  
 13 humidity that were as close to naturally-varying conditions as possible. We dispensed 90 ml of  
 14 media (as described above) directly into the bottom of each cage. This volume of food was 9  
 15 times that used to rear offspring of the same number of flies at low density in the laboratory  
 16 (see methods of line maintenance above), to prevent food becoming a limiting resource during  
 17 this experiment, and to minimize density-dependent competition among larvae. Cages were  
 18 suspended from tree branches between 1.5–1.8 m above the ground. We placed iButton  
 19 temperature loggers (Maxim integrated Products, San Jose, CA, USA) inside five of the cages  
 20 at each site to record temperature hourly, to test that temperatures within cages were consistent  
 21 with those measured outside by the TinyTag data loggers, and to assay temperature variation  
 22 among cages within sites. The iButtons revealed low variability in temperature within, relative  
 23 to between sites (90% of variation in mean temperature was between compared to within sites),  
 24 and Tinytag and cage temperature measurements were highly correlated ( $R^2 = 0.88$ ,  $P < 0.001$ ).

1 Figure S3 shows a comparison between iButton measurements inside cages and Tinytag  
 2 measurements outside cages for mean daily temperature (MDT), mean daily minimum  
 3 temperature (MDT<sub>min</sub>) and mean daily maximum temperature (MDT<sub>max</sub>). Linear models  
 4 comparing the two measures revealed no significant difference between measures inside and  
 5 outside of cages for MDT or MDT<sub>max</sub>, although measurements of MDT<sub>min</sub> were, overall, lower  
 6 inside cages than outside at field sites (Figure S3). There was no significant difference between  
 7 the two measures for the change in MDT, MDT<sub>min</sub> or MDT<sub>max</sub> in relation to altitude along  
 8 gradients (Figure S3). The iButtons did not measure humidity, therefore it was not possible to  
 9 compare humidity inside and outside cages. While it is likely that humidity in cages was  
 10 increased relative to the outside air, mean daily humidity was high at all sites (> 74%, and  
 11 usually >88%; Table S1), and is therefore unlikely to be a limiting factor for survival and  
 12 reproduction of *D. birchii*.

13  
 14 Lines were transplanted only to sites along their gradient of origin, not between gradients. At  
 15 each gradient, cage locations included the two high and two low altitude sites from which the  
 16 lines were collected, as well as sites at intermediate altitudes (Figure S2). At Mt Edith, 15 lines  
 17 (9 from low altitude, 6 from high altitude sites) were transplanted along the gradient. At  
 18 Paluma, 20 lines (10 from each end of the gradient) were transplanted. However, due to  
 19 variation in fecundity of lines in the laboratory, there were insufficient flies to transplant all  
 20 lines to all sites at each gradient. At Mt Edith, between 9 – 15 lines were transplanted at each  
 21 site, and this always included both high and low altitude lines (Figure S2). At Paluma low  
 22 altitude lines had much lower fecundity than high altitude lines (see below and Figure S4). To  
 23 maximise power to detect local adaptation (see below), Paluma lines from both high and low  
 24 altitude populations were transplanted to cages at the two high and two low altitude sites from  
 25 which lines were sourced (18 – 19 lines per site; Figure S2), but only high altitude lines were

1 transplanted to intermediate sites (6 – 8 lines per site; Figure S2). We established 325 cages at  
 2 nine sites at Mt Edith (mean = 36.1 cages/site), and 266 cages at ten sites at Paluma (mean =  
 3 26.6 cages/site) (Figure S2). Five virgin male and female flies from the same line were placed  
 4 in a given cage. At each site there were 2 - 4 cages per line. Exact numbers of lines and cages  
 5 transplanted to each site along each gradient are shown in the table within Figure S2.

6

# 7 *Estimates of cage fitness*

8 We monitored each cage daily for five days after establishment and recorded the number of  
 9 surviving adult flies each day. On the fifth day, we removed all surviving flies to ensure they  
 10 were not included in offspring counts used to measure productivity (see below). We then left  
 11 cages *in situ* for another 25 days (30 days total) to allow offspring to pupate and hatch, even at  
 12 the coolest sites. After 30 days, all cages were taken to the laboratory, where they were held  
 13 for five days at 25°C to ensure that all offspring had emerged from that generation. The first  
 14 offspring did not emerge until after 20 days at any site, while the majority of offspring had  
 15 emerged at all sites by day 30, therefore the emerging offspring were all from a single  
 16 generation. Total productivity (number of offspring emerging) was used as a measure of  
 17 fitness for each cage. This includes the effects of parental survival, however mean survival was  
 18 high (Mt Edith = 75.2%; Paluma = 80.8%) and did not vary significantly along either gradient,  
 19 or among lines, therefore the majority of productivity variation was driven by variation in  
 20 reproductive success. While fitness variation may become evident at later life history stages,  
 21 the short lifespan and relatively low population density of *D. birchii* means that mating  
 22 opportunities are likely to be a major factor limiting the lifetime fitness of *D. birchii*. This,  
 23 combined with the high and uniform survival of flies in cages along altitudinal gradients,  
 24 means that early fertility is likely to be a very important component of fitness variation in this  
 25 species. Therefore, while further data would be required to evaluate fitness variation at later

1 life history stages, we argue that within the logistical constraints of such a large experiment,  
2 focusing on this measure of fitness is justified.

3

#### 4 *Analysis of fitness variation in field cages*

5 We fitted generalised linear mixed models (GLMMs) analysing variation in fitness  
6 (productivity) in cages along each gradient to: (1) test for local adaptation, and (2) estimate  
7 genetic variation in fitness, and in the effect of movement along a gradient on fitness ('reaction  
8 norms' in fitness of lines), in order to estimate the potential for adaptive responses to  
9 environmental change.

10

11 To test for local adaptation, we used the 'sympatric-allopatric' (SA) contrast proposed by  
12 Blanquart *et al.* (2013). This method compares the fitness of *sympatric* populations  
13 (populations transplanted back to their site of origin) with that of *allopatric* populations  
14 (populations transplanted to a different site from their site of origin), while controlling for  
15 variation due to habitat (i.e., environmental variation among transplant sites) and source  
16 population (i.e., due to genetic differences in fitness among source populations) (Blanquart *et*  
17 *al.*, 2013). This comparison has greater power to detect local adaptation than other more  
18 restrictive definitions of local adaptation (e.g., the 'home vs away' and 'local vs foreign'  
19 comparisons described by Kawecki and Ebert (2004)) (Blanquart *et al.*, 2013). By maximising  
20 the number of transplants to gradient ends (where flies were sourced), we obtained the largest  
21 possible number of sympatric-allopatric comparisons, which increased our power to detect  
22 local adaptation (Blanquart *et al.*, 2013).

23

1 GLMMs included as fixed effects: (1) environmental variables (a subset of PC1, PC2, (PC1)<sup>2</sup>,  
2 and (PC2)<sup>2</sup>. Terms were sequentially removed and models compared to determine whether  
3 each improved model fit; see results), to account for habitat variation among transplant sites,  
4 (2) ‘source population’, a categorical variable with four levels corresponding to the populations  
5 from which *D. birchii* were sourced within a gradient, and (3) a ‘local adaptation’ term  
6 indicating whether a cage was ‘sympatric’ or ‘allopatric’, as defined above. Evidence for local  
7 adaptation is indicated by significantly higher fitness of sympatric cages than allopatric cages,  
8 after controlling for habitat and population effects.

9

10 We included random intercept and slope terms for the effect of line (nested within source  
11 population) to estimate: (i) genetic variation in fitness (averaged across the whole gradient),  
12 and (ii) variation among lines in fitness responses to environmental change (“fitness reaction  
13 norms”), respectively. Random slope terms tested for variation in the fitness responses of lines  
14 with respect to the same environmental variables as were included as fixed effects in the model  
15 (i.e. a subset of PC1, PC2, (PC1)<sup>2</sup>, and (PC2)<sup>2</sup>; see above and results).

16

17 Productivity data were over-dispersed relative to the Poisson distribution generally used for  
18 modelling count data, and had an excess of zeroes due to over-representation of cages from  
19 which no offspring emerged. We therefore modelled productivity as a negative binomial  
20 distribution (Lindén & Mäntyniemi, 2011), specifying zero-inflation, and used a log link  
21 function. GLMMs were fitted using the *R* package *glmmADMB* 0.8.0 (Fournier *et al.*, 2012,  
22 Skaug *et al.*, 2013). Separate models were fitted for each gradient.

23

24 *Genetic variation in productivity in the laboratory*



1 We assessed variation among lines and source populations from Paluma and Mt Edith in their  
 2 productivity in the laboratory for comparison with genetic variation estimated from field cages.  
 3 Productivity was measured as the number of offspring emerging from crosses established to  
 4 generate flies for the caged transplant experiment (see above), therefore it included the same set  
 5 of lines as in analyses of cage fitness variation. We again fitted GLMMs using *glmmADMB*,  
 6 using the same distribution as in analyses of cage fitness variation (see above). We included  
 7 source population as a fixed predictor, and maternal isofemale line (nested within source  
 8 population) as a random factor. To assess whether lines with high productivity under  
 9 laboratory conditions also performed well in the field, we compared the rank order of lines for  
 10 productivity in the laboratory and in the field using a Spearman's rank correlation test,  
 11 implemented using the *cor.test* function in *R* v3.1.2 (R Core Team, 2014). Separate models  
 12 were fitted for each gradient in both sets of analyses.

13

14

### 15 ***Predicting local abundance of *D. birchii* from variation in cage fitness***

16

17 We fitted linear models to test how well cage fitness predicted local abundance of *D. birchii* at  
 18 the gradients where caged transplants were undertaken (Paluma and Mt Edith). We used mean  
 19 productivity in field cages as a measure of fitness at each site. Fitness and abundance data were  
 20 both standardised to a mean of 0 and standard deviation of 1 so that they were on the same  
 21 scale. We fitted linear models with the *lm* function in *R* v3.1.2 (R Core Team, 2014), using  
 22 standardised productivity as the predictor variable, and standardised abundance of *D. birchii* as  
 23 the response variable. Separate models were fitted for each gradient.

24

25

# 1     **RESULTS**

2

## 3     ***Predicting local abundance of *D. birchii* from environmental variables***

4

5     At all gradients except Mt Lewis, the first Principal Component (PC1) from the PCA of  
6     environmental variables was a significant predictor of *D. birchii* abundance (Table 1; Figure  
7     1C). However, the strength and shape of the relationship between PC1 and abundance varied  
8     substantially between gradients (Table 1; Figure 1C). Abundance of *D. birchii* increased with  
9     PC1 at Mt Edith (indicating increased abundance at higher temperatures/lower altitudes), and  
10    decreased with PC1 at Paluma (Table 1; Figure 1C). At Mt Edith and Kirrama, model fit was  
11    improved by the addition of a quadratic term for PC1 (Table 1). Given that the four gradients  
12    span different altitude and temperature ranges (Table S1), these different patterns reflect, in  
13    part, variation in the range of values of PC1 present within each gradient (Figure 1B).  
14    However, differences are still evident when gradients are compared over equivalent values of  
15    PC1 (Figure 1C). PC2 did not improve the fit of the model of *D. birchii* abundance overall  
16    (Table 1), or of models of *D. birchii* abundance within each gradient.

17

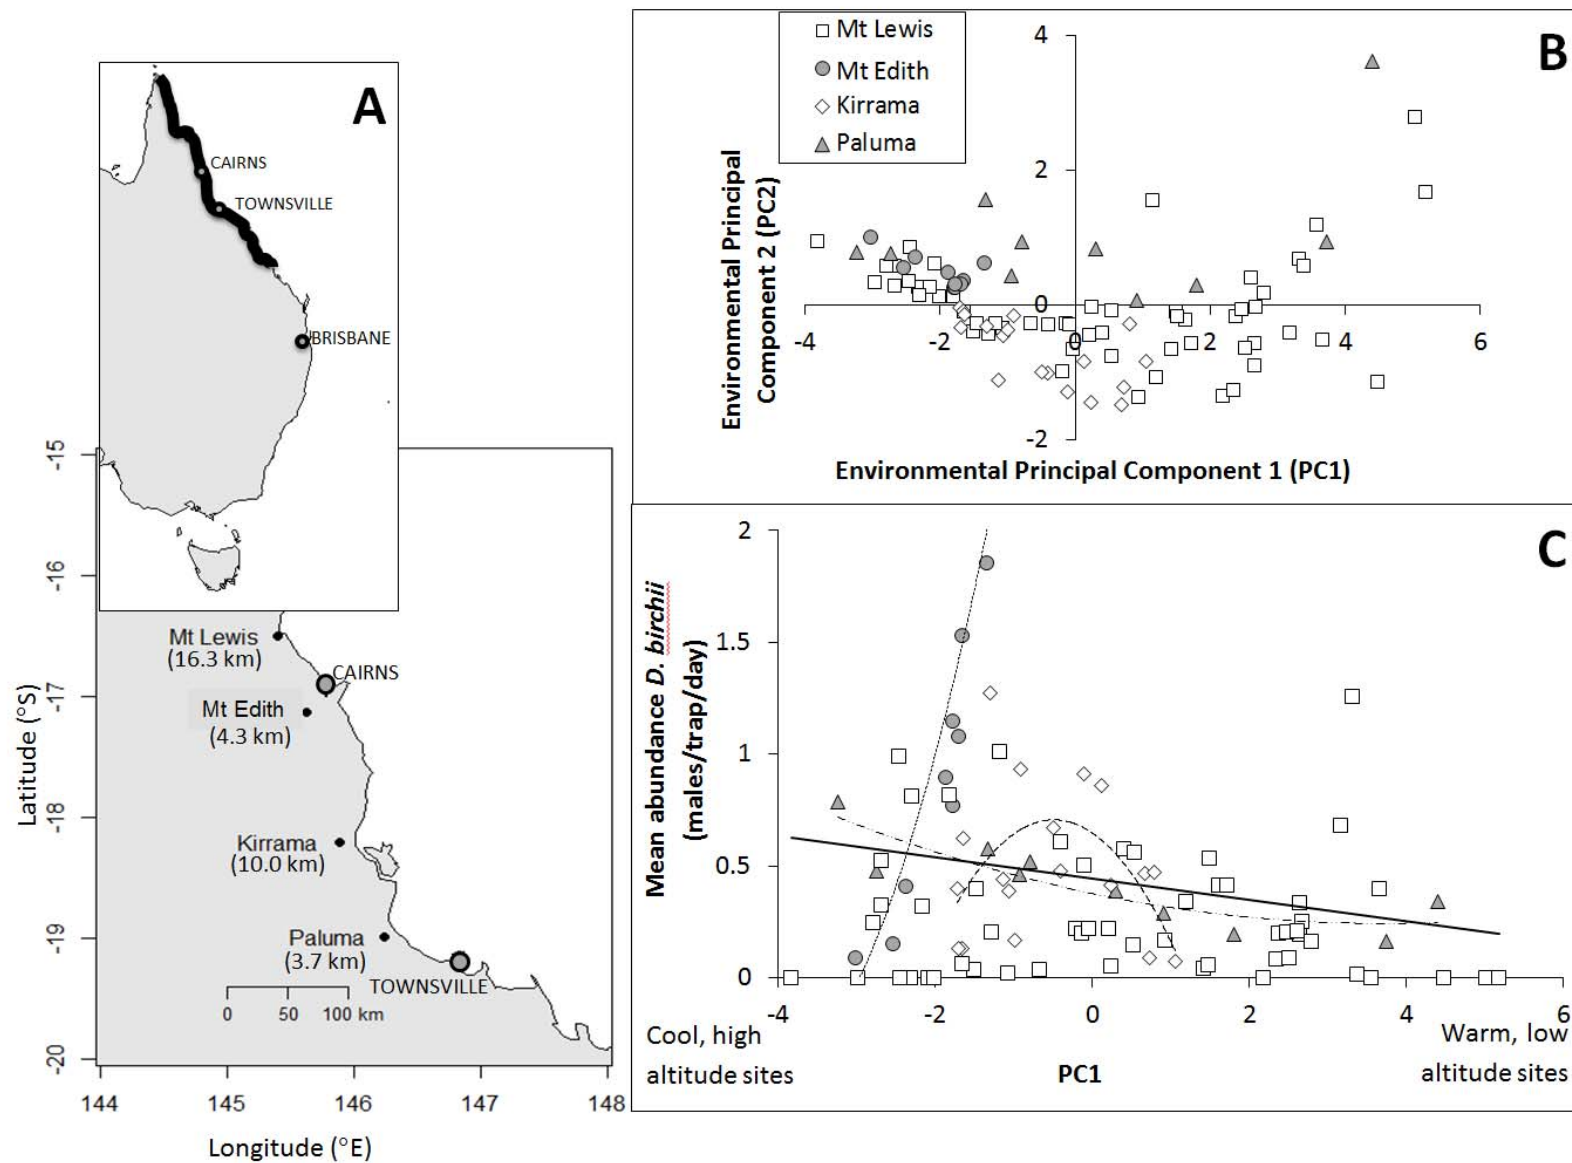

1 **Figure 1. A.** Locations of the altitudinal gradients where *D. birchii* was sampled, with the length of each gradient given in brackets. Thick black  
2 line on top map indicates the extent of *D. birchii*'s distribution in Australia. **B.** Plot showing the position of sites along each of the four  
3 altitudinal gradients with respect to the first two Principal Components (PC1 and PC2) from a Principal Components Analysis of six  
4 environmental variables. The loading of each environmental variable on these PCs is shown in Table S4. **C.** Mean abundance of *D. birchii*  
5 against PC1 for each of the four altitudinal gradients (see legend in B for interpretation of symbols). Fitted curves from linear models of mean  
6 abundance on PC1 are shown for gradients where this relationship was significant ( $P < 0.05$ ; see Table 1): Mt Edith (dotted line), Kirrama  
7 (dashed line) and Paluma (dash-dot line). The solid line is the fitted relationship from a model including the full data set ( $R^2 = 0.10$ ,  $F_{1,90} = 10.68$ ,  
8  $P = 0.002$ ).

**Table 1.** Predicting *D. birchii* abundance along four altitudinal gradients based on environmental variation. Environmental variation is represented by the first two principal components (PC1 and PC2) of the ordination analysis (see text and Figure 1B). For the overall analysis, gradient and interactions of gradient with linear and quadratic terms for each predictor were included. Factors showing a significant interaction with gradient (PC1 and PC1<sup>2</sup>) were then included in models for each gradient individually. Model statistics indicating the fit of each model are also shown. Significant terms ( $p < 0.05$ ) in each model are in *italics*.

| Predictor                   | df | SS    | F    | P                     | Model statistics          |
|-----------------------------|----|-------|------|-----------------------|---------------------------|
| Gradient                    | 3  | 20.57 | 9.99 | $1.39 \times 10^{-5}$ | Adj. $R^2 = 0.404$        |
| PC1                         | 1  | 2.10  | 3.06 | 0.09                  | $F_{19,72} = 4.25$        |
| PC1 <sup>2</sup>            | 1  | 0.85  | 1.23 | 0.27                  | $P = 3.86 \times 10^{-6}$ |
| PC2                         | 1  | 0.73  | 1.06 | 0.31                  |                           |
| PC2 <sup>2</sup>            | 1  | 0.25  | 0.36 | 0.55                  |                           |
| Gradient x PC1              | 3  | 17.78 | 8.64 | $5.70 \times 10^{-5}$ |                           |
| Gradient x PC1 <sup>2</sup> | 3  | 8.82  | 4.29 | 0.01                  |                           |
| Gradient x PC2              | 3  | 3.14  | 1.53 | 0.22                  |                           |
| Gradient x PC2 <sup>2</sup> | 3  | 1.19  | 0.58 | 0.63                  |                           |
| Residual                    | 72 | 49.42 |      |                       |                           |

**Estimates of parameters for each gradient:**

| Gradient | Parameter        | Estimate (SE)  | t      | P                     | Model statistics   |
|----------|------------------|----------------|--------|-----------------------|--------------------|
| Mt Lewis | Intercept        | 0.264 (0.046)  | 5.722  | $5.28 \times 10^{-7}$ | Adj. $R^2 = 0$     |
|          | PC1              | -0.015 (0.021) | -0.721 | 0.474                 | $F_{2,52} = 0.892$ |
|          | PC1 <sup>2</sup> | -0.003 (0.007) | -0.430 | 0.669                 | $P = 0.416$        |
| Mt Edith | Intercept        | 6.094 (1.144)  | 5.328  | 0.002                 | Adj. $R^2 = 0.920$ |
|          | PC1              | 4.052 (1.057)  | 3.833  | 0.009                 | $F_{2,6} = 46.82$  |
|          | PC1 <sup>2</sup> | 0.683 (0.234)  | 2.923  | 0.027                 | $P = 0.0002$       |
| Kirrama  | Intercept        | 0.650 (0.108)  | 6.043  | $2.25 \times 10^{-5}$ | Adj. $R^2 = 0.213$ |
|          | PC1              | -0.247 (0.109) | -2.254 | 0.040                 | $F_{2,15} = 3.295$ |
|          | PC1 <sup>2</sup> | -0.254 (0.102) | -2.490 | 0.025                 | $P = 0.065$        |
| Paluma   | Intercept        | 0.373 (0.046)  | 8.185  | $7.88 \times 10^{-5}$ | Adj. $R^2 = 0.681$ |
|          | PC1              | -0.071 (0.016) | -4.517 | 0.003                 | $F_{2,7} = 10.58$  |
|          | PC1 <sup>2</sup> | 0.009 (0.006)  | 1.513  | 0.174                 | $P = 0.008$        |

8

9

1    *Testing for genetic variation in responses to environmental change: caged transplant*  
2    *experiment*

4    *Testing for local adaptation along altitudinal gradients*

5    There was no evidence for local adaptation within gradients; ‘sympatric’ cages did not  
6    outperform ‘allopatric’ cages after controlling for habitat and population effects at either  
7    gradient (Table 2; Figure 2). At Mt Edith, the SA contrast was only marginally non-significant  
8    ( $P=0.052$ ; Table 2), but fitness of allopatric cages exceeded that of sympatric cages (Figure 2),  
9    which is opposite to expectations if the difference is due to local adaptation. At Paluma, there  
10    was no significant difference between the fitness of sympatric and allopatric cages, and the  
11    trend was also opposite to that predicted with local adaptation ( $P=0.774$ ; Table 2; Figure 2).

12  
13    There were highly significant effects of environmental variation on cage fitness. Along both  
14    altitudinal gradients there was a significant, non-linear increase in cage productivity with  
15    increasing PC1 (increasing temperature)(Figure 3). Source population effects approached  
16    significance at Mt Edith ( $P=0.068$ ; Table 2), which was attributable to low fitness of flies from  
17    one of the source populations (Figure S5), and was non-significant at Paluma ( $P=0.302$ ; Table  
18    2; Figure S5).

**Table 2.** Tests for local adaptation and genetic variation in fitness from caged transplant experiments along the Mt Edith and Paluma altitudinal gradients, using Generalised Linear Mixed Models (GLMMs). The fixed effects included: linear and quadratic terms for PC1, which were significant predictors of *D. birchii* abundance at these gradients, ‘source population’, and a ‘local adaptation’ term which compared cages transplanted back to the site where flies originated (‘sympatric’) with those transplanted to a different site (‘allopatric’). Random intercept and slope (with respect to PC1) terms for the effect of isofemale line nested in source population (‘Line’ in table) were also included. Significant effects are denoted in *italics*. The significance of fixed effects was evaluated using a  $\chi^2$  test, and of random effects using a likelihood-ratio test comparing models with and without each term included. Variance components were estimated after removing non-significant fixed effects from the model.

| Gradient | <i>Fixed effects</i>                            |      |          |                        | <i>Random effects</i> |                       |          |
|----------|-------------------------------------------------|------|----------|------------------------|-----------------------|-----------------------|----------|
|          | Predictor                                       | d.f. | $\chi^2$ | <i>P</i>               | Variance component    | Variance              | <i>P</i> |
| Mt Edith | <i>PC1</i>                                      | 1    | 3.92     | 0.048                  | Line                  |                       |          |
|          | <i>PC1</i> <sup>2</sup>                         | 1    | 7.11     | 0.008                  | Intercept             | 0.043                 | 0.014    |
|          | Source population                               | 3    | 7.12     | 0.068                  | Slope (PC1)           | 0.013                 | 0.488    |
|          | Local adaptation:<br>Sympatric vs<br>Allopatric | 1    | 3.78     | 0.052                  |                       |                       |          |
|          | Residual                                        | 314  |          |                        |                       |                       |          |
| Paluma   | <i>PC1</i>                                      | 1    | 130.15   | $<2.2 \times 10^{-16}$ | Line                  |                       |          |
|          | <i>PC1</i> <sup>2</sup>                         | 1    | 45.67    | $1.40 \times 10^{-11}$ | Intercept             | 0.020                 | 0.658    |
|          | Source population                               | 3    | 3.65     | 0.302                  | Slope (PC1)           | $2.19 \times 10^{-9}$ | 1        |
|          | Local adaptation:<br>Sympatric vs<br>Allopatric | 1    | 0.08     | 0.774                  |                       |                       |          |
|          | Residual                                        | 253  |          |                        |                       |                       |          |

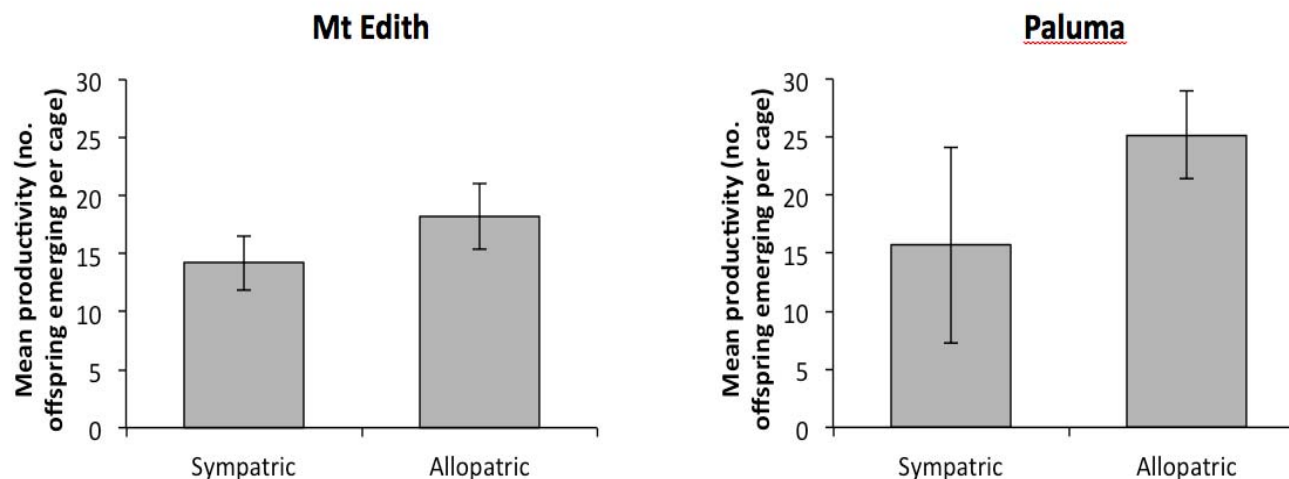

**Figure 2. No evidence for local adaptation in caged transplants.** Plots show the results of tests for local adaptation in caged transplants at Mt Edith and Paluma using sympatric-allopatric (SA) contrasts. The mean productivity (no. offspring emerging) of cages of flies transplanted back into their site of origin (sympatric), and those transplanted to all of the other sites along the same gradient (allopatric) are shown. Error bars are standard errors across the four source populations when transplanted sympatrically or allopatrically. The difference in productivity between sympatric and allopatric populations was marginally significant at Mt Edith ( $P = 0.052$ ) and non-significant at Paluma ( $P = 0.774$ ) (see Table 2).



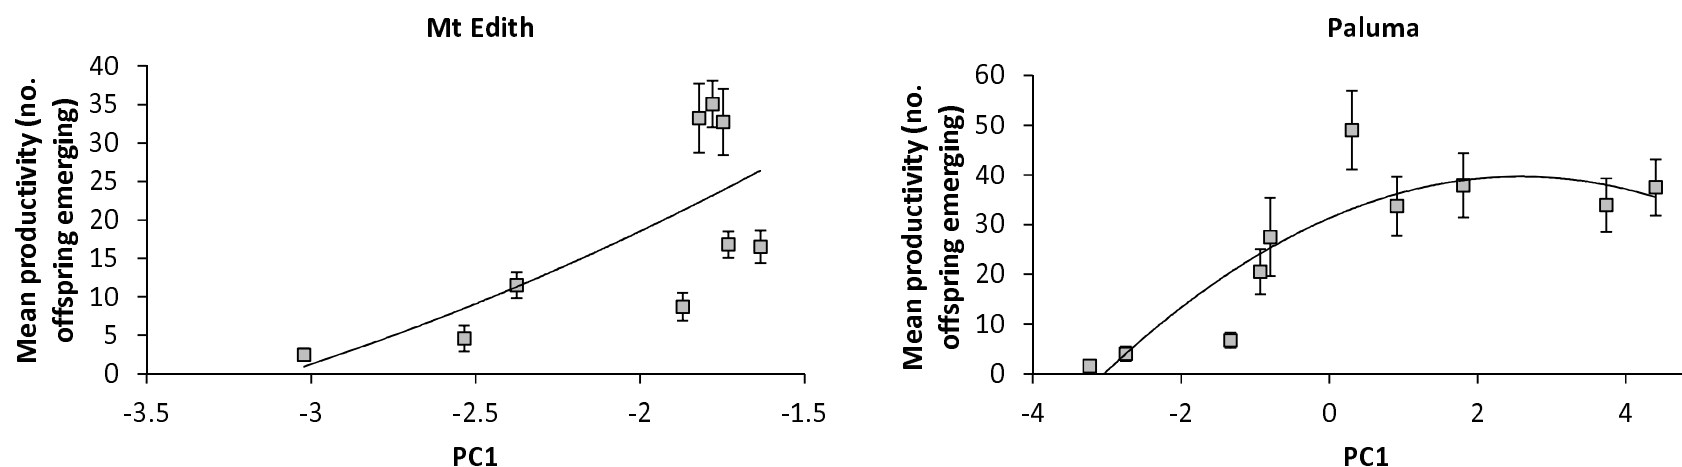

**Figure 3. Fitness in cages increases with mean temperature along altitudinal gradients.** Plots show mean productivity of cages placed at each site along altitudinal gradients at Mt Edith and Paluma. Mean site productivity (averaged across the cages at each site) is plotted as a function of PC1, the first principal component of a PCA of variation for a set of environmental variables (see Methods and Figure 1B), which is strongly, positively associated with temperature. Fitted curves are from linear models of productivity on PC1 for each gradient (see Table 2). Error bars indicate standard errors based on isofemale lines at each site. Note that the Paluma gradient encompasses a much wider range of values of PC1 than Mt Edith. Points have been offset slightly along the x-axis at Mt Edith to reduce overlap.

# 1    *Variation in cage fitness and reaction norms of fitness among lines*

2    There was significant variation among lines in cage productivity at Mt Edith ( $P = 0.014$ ), but  
3    not at Paluma ( $P = 0.658$ )(Table 2). At Mt Edith, the mean productivity of the ‘fittest’ line  
4    (24.5 offspring/cage) was more than seven times that of the least fit line (3.4 offspring/cage),  
5    whereas at Paluma the fittest line (37.5 offspring/cage) had mean productivity twice that of the  
6    least fit (19 offspring/cage). We did not detect significant variation among lines in the slopes  
7    of their responses (i.e. their ‘reaction norms’ of fitness) to the change in environment  
8    experienced as a result of being transplanted along gradients, as captured by variation in the  
9    slopes of their fitness with respect to PC1 (Table 2). Random slope variation with respect to  
10   the other PC terms was also not significant for either gradient. These results suggest that there  
11   is significant genetic variation in mean fitness across these environmental conditions at Mt  
12   Edith, but at both gradients all lines respond similarly to the change in environment; that is,  
13   lines with high relative fitness at one end of the gradient tend to have high fitness at all sites.

14

## 15    *Genetic variation in productivity in the laboratory*

16   Consistent with results from the field experiment, we found significant among-line variation in  
17   laboratory productivity at Mt Edith, but not Paluma (Table S5). However, estimates of among-  
18   line variance in the laboratory were much higher than in the field for both gradients (Table S5;  
19   *cf* Table 2). In contrast to the field experiment, variation among source populations for  
20   laboratory productivity was highly significant at both gradients (Table S5), with high altitude  
21   source populations showing higher productivity than low altitude populations in both cases  
22   (Figure S4). A Spearman’s rank correlation test revealed that, while the rank order of lines for  
23   productivity in the laboratory and in the field was positively correlated at both gradients, the  
24   correlation was not distinguishable from zero at either gradient (Mt Edith:  $\rho = 0.271$ ,  $P =$

1 0.327; Paluma:  $\rho = 0.173$ ,  $P = 0.492$ ), suggesting the relative fitness of lines under constant  
2 conditions is not a good predictor of their relative fitness in the more variable field  
3 environment.

4

#### 5 ***Predicting local abundance of *D. birchii* from cage fitness***

6

7 Cage productivity changed in the same direction as local abundance of *D. birchii* along the Mt  
8 Edith gradient, and this relationship was marginally non-significant (Slope (SE) = 1.313 (0.57);  
9  $P = 0.054$ ). However, this relationship was significantly negative along the Paluma gradient  
10 (Slope (SE) = -0.253 (0.08);  $P = 0.012$ )(Table S6; Figure 4). As outlined above, cage  
11 productivity increased with increasing PC1 (i.e., towards warmer, lower altitude sites) at both  
12 gradients (Figure 3). Paluma covered a wider range of PC1 values than Mt Edith; specifically,  
13 Paluma included much higher values, reflecting higher temperatures. Therefore, the difference  
14 between the gradients in the relationship between cage fitness and abundance implies that,  
15 while cage productivity is a good predictor of local abundance of *D. birchii* at cooler, high  
16 altitude sites, it fails to predict changes in abundance towards the warm margin of this species'  
17 range.

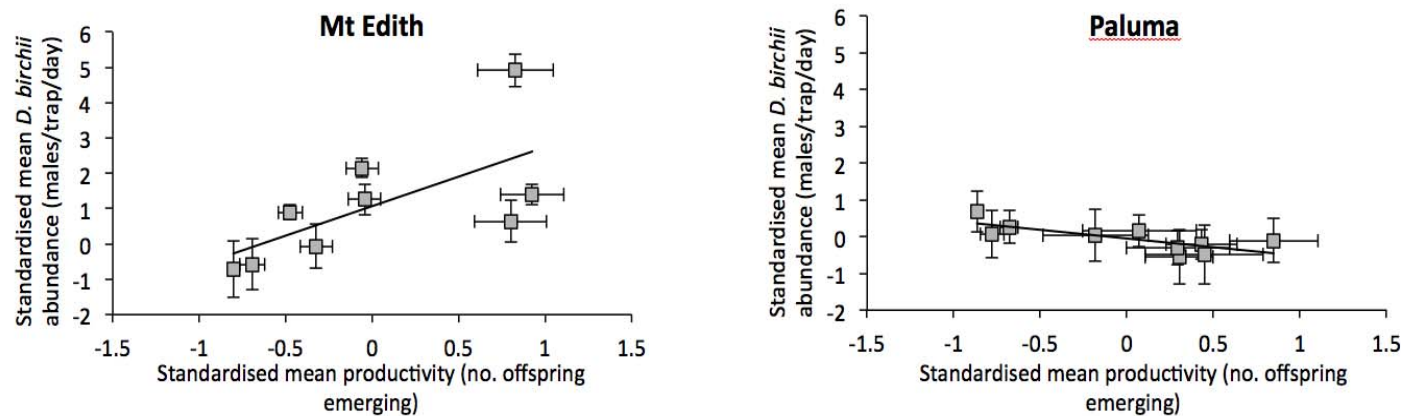

**Figure 4. Cage fitness predicts local abundance at cool, high altitude sites but not at warm, low altitude sites.** Plots show the relationship between fitness estimated from the caged transplant experiment (cage productivity) and the local abundance of *D. birchii* estimated from field sampling at Mt Edith and Paluma. Fitness and abundance data were both standardised to mean = 0 and standard deviation = 1. Error bars on abundance (y-axis) are standard errors across sampling days, and on productivity (x-axis) are standard errors among lines. Fitted lines are shown from regressions of standardised mean *D. birchii* abundance on standardised mean productivity (see Table S4).

## DISCUSSION

Predicting the effect of rapid environmental change on species' distributions, and therefore the persistence of ecological communities, is an urgent priority. However such predictions typically rely on models that assume a constant relationship between abiotic environmental variation and species' persistence or abundance, thus ignoring the potential for evolutionary change in environmental tolerances, and the influence of biotic interactions. Our approach, which combines surveys of field abundance, cage transplant experiments, and both laboratory and field estimates of genetic variation in fitness in the rainforest fruit fly *Drosophila birchii*, provides a comprehensive test of these assumptions, along ecological gradients that characterise distributional limits of this species at different spatial scales.

### *Predicting responses to environmental change from the relationship between D. birchii abundance and environmental variation*

Our field surveys revealed that local abundance of *D. birchii* is strongly predicted by environmental variation at three of the four altitudinal gradients studied, which each exhibits variation in mean temperature characteristic of hundreds of kilometres of latitudinal distance (Table S1). Overall, there was a decline in the abundance of *D. birchii* towards warm, low altitude sites (Figure 1), which suggests that the rising temperatures forecast as a result of climate change will reduce the area of suitable habitat for this species. However, the relationship between environment and local *D. birchii* abundance differed between gradients (Table 1), suggesting local variation in the response of this species to environmental change. Predictions of *D. birchii* abundance based on its association with environmental variables at a

1 broad geographical scale would therefore perform poorly at a local scale. This variation in the  
2 relationship of *D. birchii* abundance with environmental conditions could be caused by other  
3 factors affecting abundance that vary among gradients that were not captured by our measures  
4 of environmental variation, and/or local adaptation within or among gradients, enabling  
5 population growth over different ranges of environments at different gradients. We consider  
6 each of these possibilities below.

7

8

9 ***Cage transplants along altitudinal gradients: does the abiotic environment predict the fitness***  
10 ***of D. birchii?***

11

12 Fitness, as measured by productivity in cages, showed consistent increases with temperature  
13 along both gradients. This was in contrast to the reduction in abundance at warmer (low  
14 altitude) sites in our surveys of field abundance. This surprising result suggests that there are  
15 factors excluded from our cages that restrict *D. birchii*'s distribution at its warm ecological  
16 limit. The cage transplant experiment exposed flies to changes in the naturally-varying abiotic  
17 (i.e. temperature and humidity) environment, but there are likely to be significant changes in  
18 the biotic environment (e.g., competitors, parasites, pathogens) over this scale that were absent  
19 from cages, and which may constrain *D. birchii*'s abundance towards its warmer margin. This  
20 is consistent with the hypothesis, initially proposed by Darwin (1859), and subsequently  
21 supported by numerous authors (e.g. Ettinger *et al.*, 2011, MacArthur, 1972), that abiotic  
22 factors are the principal limit to species' distributions at high latitudes and altitudes, while the  
23 importance of biotic interactions increases towards warmer margins at lower latitudes and  
24 altitudes. The lowest latitude, and on average warmest, gradient included in our abundance  
25 survey, Mt Lewis, was the only gradient where abiotic environmental variation (captured by

1 PC1) did not predict *D. birchii* abundance (Table 1), again suggesting a potential role for biotic  
 2 factors. Further work is underway to identify important biotic interactions. However, we note  
 3 that PC2, which is largely driven by the abundance of non-*birchii serrata*-complex species  
 4 (Figure 1B), did not predict *D. birchii* abundance at any gradient (Table 1), suggesting that  
 5 competition with these closely related species is not the key factor limiting the distribution of  
 6 this species.

7  
 8 Understanding how biotic and abiotic factors interact to shape species' distributions is crucial  
 9 for predicting the responses of ecological communities to environmental change (Alexander *et al.*,  
 10 2015, Araújo & Luoto, 2007, Godsoe *et al.*, 2015, Grassein *et al.*, 2014). Predicting the  
 11 effect of changes in either the abiotic or biotic environment on species distributions is  
 12 complicated by the fact that these different components of environmental variation are typically  
 13 highly correlated in nature. Most species' distribution models either ignore biotic variables, or  
 14 implicitly assume that these correlations will remain constant in future (Araújo & Luoto,  
 15 2007). However, abiotic and biotic factors may become uncoupled if interacting species within  
 16 an ecological community differ in their responses to environmental change, resulting in novel  
 17 species' assemblages (e.g. Alexander *et al.*, 2015). Future studies should explicitly test for the  
 18 effects of biotic interactions within and among species on fitness, in combination with abiotic  
 19 factors, to better understand local variation in evolutionary responses to environmental change,  
 20 and therefore the persistence of species and local communities in response to ongoing climate  
 21 change.

22  
 23 ***Local adaptation and genetic variation in fitness and reaction norms in response to***  
 24 ***movement along altitudinal gradients, and comparison with laboratory estimates***

25

1 A central question when predicting the impacts of climate change and habitat loss on species'  
2 distributions is the extent to which species' responses are affected by existing local adaptation  
3 and future evolutionary potential (Gienapp *et al.*, 2008, Hoffmann & Sgrò, 2011, Parmesan,  
4 2006). Modelling has shown that the presence of such intraspecific genetic variation in  
5 ecologically relevant traits, as well as adaptive divergence among populations, can significantly  
6 alter predictions of species' current and future distributions (Atkins & Travis, 2010, Banta *et*  
7 *al.*, 2012, Valladares *et al.*, 2014).

8

9 We did not detect evidence of local adaptation within either gradient. Although there was  
10 significant genetic variation in overall fitness at Mt Edith, all lines transplanted at both  
11 gradients responded similarly to the imposed change in their environment. In other words,  
12 reaction norms for fitness of different lines do not intersect or vary in steepness, indicating that  
13 fitness under conditions at one end of the gradient does not 'trade off' against fitness at the  
14 opposite end. The lack of local adaptation within gradients is surprising, because divergent  
15 selection between gradient ends is expected to be strong in this system, given the substantial  
16 and consistent difference in their abiotic environments (temperature and humidity), and the  
17 significant consequences of this for fitness of *D. birchii*, as shown by our cage transplant  
18 experiments. Possible explanations for a lack of local adaptation along gradients include gene  
19 flow, which has been shown to be high in this species over larger geographic distances than  
20 were considered here (Schiffer *et al.*, 2007, van Heerwaarden *et al.*, 2009), and may swamp  
21 local adaptation, particularly given the steep changes in abundance observed even between  
22 adjacent sites, which are likely to lead to asymmetrical gene flow (Bridle *et al.*, 2009, Bridle &  
23 Vines, 2007). Alternatively, populations occupying marginal habitat towards the species' range  
24 edge may lack sufficient genetic variation to track local optima by adaptation, potentially due  
25 to small population size, or trade-offs between different components of fitness (Blows &



1 Hoffmann, 2005). Differences in the relative importance of abiotic and biotic factors at each  
2 end of the altitudinal range of *D. birchii* may also explain why we did not detect either genetic  
3 variation in fitness reaction norms or local adaptation in our cage transplant experiment. If  
4 biotic interactions (rather than temperature or humidity) constrain the distribution of *D. birchii*  
5 at its warm margin, fitness trade-offs may become apparent when measured in the presence of  
6 such interactions.

7  
8 Nevertheless, previous studies in *D. birchii* have revealed latitudinal clines (over similar  
9 temperature ranges) suggestive of local adaptation in development time (Griffiths *et al.*, 2005),  
10 resistance to desiccation (Hoffmann *et al.*, 2003, Kellermann *et al.*, 2006) and starvation  
11 (Griffiths *et al.*, 2005, van Heerwaarden *et al.*, 2009), as well as altitudinal clines in chill coma  
12 tolerance (Bridle *et al.*, 2009). However, all of these studies examined trait variation under  
13 constant conditions in the laboratory. While it is likely that the patterns of trait variation they  
14 observed were the result of selection, the fitness consequences of this variation may become  
15 evident only under certain sets of conditions, since environmental conditions are known to  
16 affect estimates of trait heritabilities (Charmantier & Garant, 2005, Hoffmann & Merilä, 1999,  
17 Pemberton, 2010). We also found significant genetic variation in productivity among *D.*  
18 *birchii* populations in the laboratory, but not in the field, where conditions were more variable.  
19 This indicates that environmental variation can constrain responses to selection by masking  
20 fitness differences, and highlights the importance of assaying fitness under naturally-varying  
21 conditions when inferring adaptive potential in wild populations.

22  
23  
24  
25 ***Implications for predicting biological responses to environmental change***

1

2 Three important findings emerge from our study that would affect the accuracy of predicted  
3 changes in the distribution of *D. birchii* in response to environmental change using traditional  
4 Species' Distribution Models. (1) The relationship between environmental variation and  
5 abundance differs between gradients, demonstrating the importance of geographic scale in  
6 predictive models. (2) The effect of abiotic environmental variation on fitness of *D. birchii* in  
7 cages does not mirror the change in field abundance, suggesting an important role for biotic  
8 interactions in limiting the distribution of this species. (3) There is no local adaptation or  
9 genetic variation in fitness reaction norms of *D. birchii* within gradients, although this  
10 contradicts predictions based on laboratory estimates of genetic variation in fitness. These  
11 observations are likely to have general significance beyond the model system examined here,  
12 and can therefore offer insights on how to improve methods for predicting biological responses  
13 to environmental change.

14

15 Incorporating spatial geographic scale into Species' Distribution Models is quite  
16 straightforward, as long as abundance or occurrence data are available at a sufficiently fine  
17 scale. Ideally, sampling should be undertaken across both local and global ecological limits, to  
18 account for potential variation in the factors limiting species' distributions at these different  
19 scales (e.g. across altitudinal and latitudinal gradients Halbritter *et al.*, 2013). As has been  
20 appreciated by others, biotic interactions should be incorporated into SDMs by including data  
21 on the presence or abundance of co-occurring species as predictive factors (Araújo & Luoto,  
22 2007, Wisz *et al.*, 2013). Our results demonstrate that the importance of biotic interactions in  
23 limiting species' distributions is likely to vary across abiotic gradients, which reiterates the  
24 importance of sampling at appropriate geographic scales. Furthermore, given that key biotic  
25 interactions are themselves susceptible to the effects of changes in the abiotic environment,

1 regular re-sampling should be undertaken to identify changes in the correlation of abiotic and  
2 biotic components, and their consequences for species' distributions.

3

4 The lack of genetic variation in fitness reaction norms suggests that populations of *D. birchii*  
5 along gradients are likely to respond similarly to a changing thermal environment, and have  
6 low potential for adaptation. This contrasts with measurements under laboratory conditions  
7 (both in the present study and in previous work e.g. Bridle *et al.*, 2009), which reveal  
8 significant genetic variation in ecologically important traits both within and among populations  
9 sampled from different parts of the species' altitudinal range. These data highlight the  
10 importance of assessing genetic variation in fitness under ecologically relevant conditions when  
11 predicting the potential for evolutionary responses to environmental change. This challenge is  
12 more difficult to overcome, since field estimates of genetic variation within and among  
13 populations are clearly not feasible for all taxa. Nevertheless, the current study highlights how  
14 these assessments can be undertaken using model organisms such as *Drosophila*.

15

16

## 17 **ACKNOWLEDGEMENTS**

18 We are very grateful to Peter Alexander, Chris Clinton, Ciara Mann, Amanda McGeady and  
19 Lara Meade for technical assistance. Thank you to Roger Butlin for helpful discussions on  
20 experimental design, and to James Buckley and two anonymous reviewers, whose insightful  
21 comments on earlier versions have greatly improved this manuscript. This work was funded by  
22 a Natural Environment Research Council Standard Grant to JRB. The authors declare no  
23 conflict of interest.

24

25

# REFERENCES

- Alberto FJ, Aitken SN, Alía R *et al.* (2013) Potential for evolutionary responses to climate change - evidence from tree populations. *Global Change Biology*, **19**, 1645 - 1661.
- Alexander JM, Diez JM, Levine JM (2015) Novel competitors shape species' responses to climate change. *Nature*, **525**, 515 - 518.
- Araújo MB, Luoto M (2007) The importance of biotic interactions for modelling species distributions under climate change. *Global Ecology and Biogeography*, **16**, 743 - 753.
- Atkins KE, Travis JMJ (2010) Local adaptation and the evolution of species' ranges under climate change. *Journal of Theoretical Biology*, **266**, 449 - 457.
- Banta JA, Ehrenreich IM, Gerard S *et al.* (2012) Climate envelope modelling reveals intraspecific relationships among flowering phenology, niche breadth and potential range size in *Arabidopsis thaliana*. *Ecology Letters*, **15**, 769 - 777.
- Blanquart F, Kaltz O, Nuismer SL, Gandon S (2013) A practical guide to measuring local adaptation. *Ecology Letters*, **16**, 1195 - 1205.
- Blows MW, Hoffmann AA (2005) A reassessment of genetic limits to evolutionary change. *Ecology*, **86**, 1371-1384.
- Bridle JR, Gavaz S, Kennington WJ (2009) Testing limits to adaptation along altitudinal gradients in rainforest *Drosophila*. *Proceedings of the Royal Society B: Biological Sciences*, **276**, 1507 - 1515.
- Bridle JR, Vines TH (2007) Limits to evolution at range margins: when and why does adaptation fail? *Trends in Ecology and Evolution*, **22**, 140 - 147.
- Charmantier A, Garant D (2005) Environmental quality and evolutionary potential: lessons from wild populations. *Proceedings of the Royal Society B: Biological Sciences*, **272**, 1415-1425.
- Charmantier A, Gienapp P (2014) Climate change and timing of avian breeding and migration: evolutionary versus plastic changes. *Evolutionary Applications*, **7**, 15 - 28.
- Chevin L, Lande R, Mace GM (2010) Adaptation, plasticity, and extinction in a changing environment: towards a predictive theory. *PLoS Biology*, **8**, e1000357.
- Darwin C (1859) *The Origin of Species by Means of Natural Selection*, Cambridge, MA, Harvard University Press.
- Davis MB, Shaw RG, Etterson JR (2005) Evolutionary responses to changing climate. *Ecology*, **86**, 1704 - 1714.
- Ehrlén J, Morris WF (2015) Predicting changes in the distribution and abundance of species under environmental change. *Ecology Letters*, **18**, 303-314.
- Elith J, Leathwick JR (2009) Species distribution models: ecological explanation and prediction across space and time. *Annual Review of Ecology, Evolution and Systematics*, **40**, 677 - 697.
- Ettinger AK, Ford KR, Hillerislambers J (2011) Climate determines upper, but not lower, altitudinal range limits of Pacific Northwest conifers. *Ecology*, **92**, 1323 - 1331.
- Fournier DA, Skaug HJ, Ancheta J *et al.* (2012) AD Model Builder: using automatic differentiation for statistical inference of highly parameterized complex nonlinear models. *Optimization Methods and Software*, **27**, 233 - 249.
- Gienapp P, Teplitsky C, Alho JS, Mills JA, Merilä J (2008) Climate change and evolution: disentangling environmental and genetic responses. *Molecular Ecology*, **17**, 167 - 178.
- Godsoe W, Murray R, Plank MJ (2015) Information on biotic interactions improves transferability of distribution models. *The American Naturalist*, **185**, 281 - 290.
- Grassein F, Lavorel S, Till-Bottraud I (2014) The importance of biotic interactions and local adaptation for plant response to environmental changes: field evidence along an elevational gradient. *Global Change Biology*, **20**, 1452 - 1460.
- Griffiths JA, Schiffer M, Hoffmann AA (2005) Clinal variation and laboratory adaptation in the rainforest species *Drosophila birchii* for stress resistance, wing size, wing shape and development time. *Journal of Evolutionary Biology*, **18**, 213 - 222.

- 1 Guisan A, Thuiller W (2005) Predicting species distribution: offering more than simple habitat models.  
2 *Ecology Letters*, **8**, 993 - 1009.
- 3 Halbritter AH, Alexander JM, Edwards PJ, Billeter R (2013) How comparable are species distributions  
4 along elevational and latitudinal climate gradients? *Global Ecology and Biogeography*, **22**,  
5 1228-1237.
- 6 Hampe A (2004) Bioclimate envelope models: what they detect and what they hide. *Global Ecology*  
7 *and Biogeography*, **13**, 469 - 476.
- 8 Hoffmann AA, Griffin P, Dillon S *et al.* (2015) A framework for incorporating evolutionary genomics into  
9 biodiversity conservation and management. *Climate Change Responses*, **2**, 1 - 23.
- 10 Hoffmann AA, Hallas RJ, Dean JA, Schiffer M (2003) Low potential for climatic stress adaptation in a  
11 rainforest *Drosophila* species. *Science*, **301**, 100-102.
- 12 Hoffmann AA, Merilä J (1999) Heritable variation and evolution under favourable and unfavourable  
13 conditions. *Trends in Ecology & Evolution*, **14**, 96-101.
- 14 Hoffmann AA, Sgrò CM (2011) Climate change and evolutionary adaptation. *Nature*, **470**, 479 - 485.
- 15 Holt RD (2009) Bringing the Hutchinsonian niche into the 21st century: ecological and evolutionary  
16 perspectives. *Proceedings of the National Academy of Science USA*, **106**, 19659 - 19665.
- 17 Kawecki TJ, Ebert D (2004) Conceptual issues in local adaptation. *Ecology Letters*, **7**, 1225 - 1241.
- 18 Kearney M, Porter WP, Williams C, Ritchie S, Hoffmann AA (2009) Integrating biophysical models and  
19 evolutionary theory to predict climatic impacts on species' ranges: the dengue mosquito *Aedes*  
20 *aegypti* in Australia. *FUNCTIONAL ECOLOGY*, **23**, 528 - 538.
- 21 Kellermann VM, Van Heerwaarden B, Hoffmann AA, Sgrò CM (2006) Very low additive genetic variance  
22 and evolutionary potential in multiple populations of two rainforest *Drosophila* species.  
23 *Evolution*, **60**, 1104 - 1108.
- 24 Kelly MW, Sanford E, Grosberg RK (2012) Limited potential for adaptation to climate change in a  
25 broadly distributed marine crustacean. *Proceedings of the Royal Society B: Biological Sciences*,  
26 **279**, 349 - 356.
- 27 Kremer A, Ronce O, Robledo-Arnuncio JJ *et al.* (2012) Long-distance gene flow and adaptation of forest  
28 trees to rapid climate change. *Ecology Letters*, **15**, 378 - 392.
- 29 Kruuk LEB, Slate J, Wilson AJ (2008) New answers for old questions: the evolutionary quantitative  
30 genetics of wild animal populations. *Annual Review of Ecology, Evolution and Systematics*, **39**,  
31 525 - 548.
- 32 Lavergne S, Mouquet N, Thuiller W, Ronce O (2010) Biodiversity and climate change: integrating  
33 evolutionary and ecological responses of species and communities. *Annual Review of Ecology,*  
34 *Evolution and Systematics*, **41**, 321 - 350.
- 35 Lindén A, Mäntyniemi S (2011) Using the negative binomial distribution to model overdispersion in  
36 ecological count data. *Ecology*, **92**, 1414 - 1421.
- 37 Macarthur RH (1972) *Geographical Ecology*, New York, Harper and Row.
- 38 Parmesan C (2006) Ecological and evolutionary responses to recent climate change. *Annual Review of*  
39 *Ecology, Evolution and Systematics*, **37**, 637 - 669.
- 40 Pearson RG, Dawson TP (2003) Predicting the impacts of climate change on the distribution of species:  
41 are bioclimate envelope models useful? *Global Ecology and Biogeography*, **12**, 361 - 371.
- 42 Pemberton JM (2010) Evolution of quantitative traits in the wild: mind the ecology. *Philosophical*  
43 *Transactions of the Royal Society of London. Series B, Biological Sciences*, **365**, 2431 - 2438.
- 44 R Core Team (2014) R: A language and environment for statistical computing. pp Page, [http://www.R-](http://www.R-project.org/)  
45 [project.org/](http://www.R-project.org/), Foundation for statistical computing, Vienna, Austria.
- 46 Schiffer M, Kennington WJ, Hoffmann AA, Blacket MJ (2007) Lack of genetic structure among  
47 ecologically adapted populations of an Australian rainforest *Drosophila* species as indicated by  
48 microsatellite markers and mitochondrial DNA sequences. *Molecular Ecology*, **16**, 1687 - 1700.
- 49 Schiffer M, Mcevey SF (2006) *Drosophila bunnanda* - a new species from northern Australia with notes  
50 on other Australian members of the *montium* subgroup (Diptera:Drosophilidae). *Zootaxa*,  
51 **1333**, 1-23.

1 Skaug H, Fournier DA, Nielsen A, Magnusson A, Bolker BM (2013) Generalized Linear Mixed Models  
2 using AD Model Builder. . pp Page.  
3 Thomas CD, Cameron A, Green RE *et al.* (2004) Extinction risk from climate change. *Nature*, **427**, 145 -  
4 148.  
5 Valladares F, Matesanz S, Guilhaumon F *et al.* (2014) The effects of phenotypic plasticity and local  
6 adaptation on forecasts of species range shifts under climate change. *Ecology Letters*, **17**, 1351  
7 - 1364.  
8 Van Heerwaarden B, Kellermann V, Schiffer M, Blacket M, Sgrò CM, Hoffmann AA (2009) Testing  
9 evolutionary hypotheses about species borders: patterns of genetic variation towards the  
10 southern borders of two rainforest *Drosophila* and a related habitat generalist. *Proceedings of*  
11 *the Royal Society B: Biological Sciences*, **276**, 1517 - 1526.  
12 Wisz MS, Pottier J, Kissling WD *et al.* (2013) The role of biotic interactions in shaping distributions and  
13 realised assemblages of species: implications for species distribution modelling. *Biological*  
14 *Reviews*, **88**, 15-30.  
15  
16  
17  
18

## 1 Supporting Information captions

2

3 **Table S1.** Location and environmental variation of altitudinal gradients where *D. birchii* was  
 4 collected between 2010 – 12, including altitudinal range, total length (the straight-line distance  
 5 between the top and bottom of each gradient in km), number of sites sampled, ranges of  
 6 environmental variables (Mean daily temperature (MDT); Mean daily minimum temperature  
 7 (MDT<sub>min</sub>); Mean daily maximum temperature (MDT<sub>max</sub>); Mean daily humidity (MDH)), *D.*  
 8 *birchii* density, density of other species from the *serrata* species complex (non-*birchii* density),  
 9 and productivity in cages (only assessed in 2012). For each environmental variable, density  
 10 and cage productivity, the range shown is the mean at the lowest altitude site to the mean at the  
 11 highest altitude site. Density of *D. birchii* and other *serrata*-complex species were not  
 12 estimated in 2012. The difference in mean temperature between the most northerly gradient  
 13 (Mt Lewis) and the most southerly gradient (Paluma) was less than the temperature difference  
 14 seen within most of the altitudinal gradients

15

16

17 **Table S2:** Linear regressions of each environmental variable measured during 2010–2012 on  
 18 (a) altitude for each gradient, and (b) altitude, latitude and their interaction across the entire  
 19 sampled range. Shown is the slope, with the Standard Error (SE) in brackets, of the regression  
 20 line between each environmental variable and altitude/latitude, and the  $R^2$  value indicating the  
 21 proportion of variation explained by the model.  $N$  is the number of sites sampled. Symbols  
 22 indicate the significance of each factor in the model: \*\*\*  $P < 0.001$ , \*\*  $0.001 \leq P < 0.01$ , \*  $0.01 \leq$   
 23  $P < 0.05$ , †  $0.05 \leq P < 0.1$ , <sup>NS</sup>  $P \geq 0.1$ . Significant associations are highlighted in *italics*.

24

25

26 **Table S3:** Correlations between environmental variables included as predictors of *D. birchii*  
 27 field abundance (below diagonal) and  $p$ -values indicating significance of correlations (above  
 28 diagonal). All correlations were highly significant, even at a very conservative Bonferroni-  
 29 corrected significance threshold of  $P = 0.003$ .

30

31

32 **Table S4.** Variation in productivity among isofemale lines (nested in source population) from  
 33 Mt Edith and Paluma when reared in the laboratory. Productivity variation was analysed using  
 34 Generalised Linear Mixed Models (GLMMs), run in the *R* package *glmmADMB*, specifying  
 35 zero-inflation, and a negative binomial distribution with a log link function. Source population  
 36 (indicating which of the four populations within a gradient the line came from) was included as  
 37 a fixed factor and maternal isofemale line ('Line', nested within source population, was  
 38 included as a random factor. Significant effects are denoted in *italics*. The significance of fixed  
 39 effects was evaluated using a  $\chi^2$  test, and of random effects using a likelihood-ratio test  
 40 comparing models with and without the term included. Separate analyses were conducted for  
 41 the two gradients. Productivity was measured as the mean number of offspring per female  
 42 produced from controlled crosses in the laboratory. Sites at both gradients differed  
 43 significantly in their productivity in the lab (but not in the field; see Table 2). Estimates of

1 among-line variance in productivity at both gradients were much higher in the laboratory than  
2 in the field (*cf* Table 2), and this variance was significant at Mt Edith.

3  
4

5 **Table S5.** Results of linear models to test how well mean fitness in cages (cage productivity)  
6 predicts local abundance in the field. Separate analyses were performed for Mt Edith and  
7 Paluma, the two gradients where caged transplants were performed. All fitness and abundance  
8 data were standardized to mean = 0; standard deviation = 1 prior to analysis. Shown are the  
9 slopes of the regressions of cage productivity on local abundance at each gradient, with the  
10 standard error of this estimate in brackets, the *t*-value for the analysis, and the significance of  
11 each test.

12  
13

14 **Figure S1.** Schematic illustrating design of caged transplant experiment. Bold lines show  
15 transplants among the sites of origin: solid lines indicate transplants back into each  
16 population's home site; large dashed lines indicate transplants to the other site of origin at the  
17 same end of the gradient; and small dashed lines indicate transplants to the sites of origin at the  
18 opposite end of the gradient. Dotted lines indicate transplants to intermediate sites along the  
19 gradient (I-1 – I-5). Transplants originating from low altitude sites (LOW 1 and LOW 2) are in  
20 red, and from high altitude sites (HIGH 1 and HIGH 2) are in blue. To improve clarity, only  
21 one set of arrows depicts transplants from each end of the gradient to sites along the gradient,  
22 but lines from both populations of origin were transplanted in each case. At Paluma, only high  
23 altitude lines were transplanted to intermediate sites, but all lines were transplanted to sites at  
24 gradient ends. \*Actual number of lines per site used in transplants varied because some lines  
25 did not produce sufficient offspring (see Methods).

26  
27

28 **Figure S2.** Mean productivity of each of the four source populations from Mt Edith (left) and  
29 Paluma (right) in laboratory crosses. Error bars are standard errors across mean productivities  
30 of the (up to five) lines within each source population. At one of the high altitude sites from Mt  
31 Edith (High1), only one of the five lines produced offspring in laboratory crosses. Different  
32 letters indicate significantly different productivity means of populations within a gradient.

33
